# Supplementary material for: Long Term Monitoring in Switzerland Reveals That Adalia bipunctata Strongly Declines in Response to Harmonia axyridis Invasion
Source: MDPI journal article supplement (doi:10.3390/insects11120883), 2020-12-12
Supplement: s1 [file s1]

# Long term monitoring in Switzerland reveals that *Adalia bipunctata* strongly declines in response to *Harmonia axyridis* invasion

Marc Kenis, Saidou Nacambo, Johan Van Vlaenderen, Renate Zindel and René Eschen

Table S1. Characteristics of the ladybird collection sites in the four habitats.

| Locality (canton)* | Years of collection | Habitat type      | Main tree and shrub genera                                                                                                            | Coordinates (°, N / E) | Elevation (m a.s.l.) |
|--------------------|---------------------|-------------------|---------------------------------------------------------------------------------------------------------------------------------------|------------------------|----------------------|
| Bure (JU)          | 2006-2017           | Broadleaved hedge | <i>Carpinus</i> , <i>Acer</i> , <i>Euonymus</i> , <i>Quercus</i> , <i>Prunus</i> , <i>Corylus</i> , <i>Cornus</i>                     | 47.4549 / 7.0038       | 540                  |
| Cornol (JU)        | 2006-2017           | Broadleaved hedge | <i>Corylus</i> , <i>Prunus</i> , <i>Salix</i> , <i>Populus</i> , <i>Acer</i> , <i>Cornus</i>                                          | 47.4023 / 7.1493       | 520                  |
| Bonfol (JU)        | 2006-2017           | Broadleaved hedge | <i>Cornus</i> , <i>Prunus</i> , <i>Euonymus</i> , <i>Alnus</i> , <i>Fraxinus</i> , <i>Salix</i> , <i>Corylus</i> , <i>Quercus</i>     | 47.4683 / 7.1565       | 440                  |
| Chevenez (JU)      | 2006-2017           | Broadleaved hedge | <i>Corylus</i> , <i>Prunus</i> , <i>Crataegus</i> , <i>Salix</i> , <i>Euonymus</i> , <i>Acer</i> , <i>Sambucus</i>                    | 47.3963 / 7.0151       | 470                  |
| Lugnez (JU)        | 2006-2017           | Broadleaved hedge | <i>Corylus</i> , <i>Euonymus</i> , <i>Prunus</i> , <i>Sambucus</i> , <i>Cornus</i>                                                    | 47.4883 / 7.0850       | 420                  |
| Bourrignon (JU)    | 2006-2017           | Broadleaved hedge | <i>Acer</i> , <i>Fraxinus</i> , <i>Fagus</i> , <i>Prunus</i> , <i>Corylus</i> , <i>Cornus</i> , <i>Tilia</i>                          | 47.3825 / 7.2662       | 860                  |
| Delémont (JU)      | 2006-2017           | Broadleaved hedge | <i>Carpinus</i> , <i>Corylus</i> , <i>Crataegus</i> , <i>Salix</i> , <i>Pyrus</i> , <i>Quercus</i>                                    | 47.3574 / 7.3363       | 420                  |
| Zwingen (BL)       | 2006-2017           | Broadleaved hedge | <i>Aesculus</i> , <i>Euonymus</i> , <i>Salix</i> , <i>Fraxinus</i> , <i>Cornus</i> , <i>Juglans</i> , <i>Quercus</i> , <i>Populus</i> | 47.4344 / 7.5235       | 340                  |
| Bubendorf (BL)     | 2006-2017           | Broadleaved hedge | <i>Corylus</i> , <i>Crataegus</i> , <i>Acer</i> , <i>Prunus</i> , <i>Fraxinus</i> , <i>Carpinus</i>                                   | 47.4369 / 7.7277       | 400                  |
| Nenzlingen (BL)    | 2006-2017           | Broadleaved hedge | <i>Prunus</i> , <i>Crataegus</i>                                                                                                      | 47.4415 / 7.5627       | 340                  |
| Aesch (BL)         | 2006-2017           | Broadleaved hedge | <i>Corylus</i> , <i>Fagus</i> , <i>Cornus</i> , <i>Quercus</i> , <i>Acer</i>                                                          | 47.4680 / 7.5867       | 330                  |
| Muttenz (BL)       | 2006-2017           | Broadleaved hedge | <i>Corylus</i> , <i>Acer</i> , <i>Forsythia</i> , <i>Salix</i>                                                                        | 47.5392 / 7.6354       | 280                  |
| Augst (BL)         | 2006-2017           | Broadleaved hedge | <i>Crataegus</i> , <i>Prunus</i> , <i>Cornus</i>                                                                                      | 47.5286 / 7.7280       | 300                  |
| Ettingen (BL)      | 2006-2017           | Broadleaved hedge | <i>Crataegus</i> , <i>Cornus</i> , <i>Lonicera</i> , <i>Sambucus</i> , <i>Prunus</i> , <i>Euonymus</i> , <i>Acer</i>                  | 47.4856 / 7.5609       | 350                  |
| Riehen (BS)        | 2006-2013           | Broadleaved hedge | <i>Syringa</i> , <i>Corylus</i> , <i>Acer</i> , <i>Rosa</i>                                                                           | 47.5924 / 7.6451       | 270                  |
| Füllinsdorf (BL)   | 2015-2017           | Broadleaved hedge | <i>Acer</i> , <i>Corylus</i> , <i>Fagus</i> , <i>Crataegus</i> , <i>Prunus</i>                                                        | 47.5161 / 7.7332       | 400                  |
| Bure (JU)          | 2006-2017           | Meadow            | n/a                                                                                                                                   | 47.4546 / 7.0034       | 530                  |
| Cornol (JU)        | 2006-2017           | Meadow            | n/a                                                                                                                                   | 47.4023 / 7.1493       | 520                  |
| Bonfol (JU)        | 2006-2017           | Meadow            | n/a                                                                                                                                   | 47.4686 / 7.1564       | 440                  |
| Chevenez (JU)      | 2006-2017           | Meadow            | n/a                                                                                                                                   | 47.3960 / 7.0154       | 470                  |
| Lugnez (JU)        | 2006-2017           | Meadow            | n/a                                                                                                                                   | 47.4881 / 7.0846       | 420                  |
| Develier (JU)      | 2006-2017           | Meadow            | n/a                                                                                                                                   | 47.3568 / 7.3002       | 460                  |
| Pleigne (JU)       | 2006-2017           | Meadow            | n/a                                                                                                                                   | 47.4030 / 7.2943       | 790                  |
| Zwingen (BL)       | 2006-2017           | Meadow            | n/a                                                                                                                                   | 47.4346 / 7.5233       | 340                  |
| Nenzlingen (BL)    | 2006-2017           | Meadow            | n/a                                                                                                                                   | 47.4416 / 7.5625       | 340                  |

|                  |           |        |                         |                  |      |
|------------------|-----------|--------|-------------------------|------------------|------|
| Muttenz (BL)     | 2006-2017 | Meadow | n/a                     | 47.5392 / 7.6354 | 280  |
| Rheinfelden (AG) | 2006-2013 | Meadow | n/a                     | 47.5459 / 7.7594 | 280  |
| Bettingen (BS)   | 2006-2013 | Meadow | n/a                     | 47.5118 / 7.6582 | 360  |
| Riehen (BS)      | 2006-2013 | Meadow | n/a                     | 47.5921 / 7.6454 | 270  |
| Biel-Benken (BL) | 2006-2013 | Meadow | n/a                     | 47.5081 / 7.5358 | 330  |
| Zunzgen (BL)     | 2006-2011 | Meadow | n/a                     | 47.4425 / 7.8085 | 410  |
| Bubendorf (BL)   | 2012-2017 | Meadow | n/a                     | 47.4363 / 7.7277 | 400  |
| Aesch (BL)       | 2015-2017 | Meadow | n/a                     | 47.4677 / 7.5870 | 325  |
| Ettingen (BL)    | 2015-2017 | Meadow | n/a                     | 47.4856 / 7.5609 | 350  |
| Augst (BL)       | 2015-2017 | Meadow | n/a                     | 47.5285 / 7.7283 | 300  |
| Föllinsdorf (BL) | 2015-2017 | Meadow | n/a                     | 47.5161 / 7.7330 | 400  |
| Lajoux (JU)      | 2007-2017 | Spruce | <i>Picea abies</i>      | 47.2644 / 7.1080 | 1000 |
| Les Genevez (JU) | 2007-2017 | Spruce | <i>Picea abies</i>      | 47.2497 / 7.1372 | 1050 |
| Le Bémont (JU)   | 2007-2017 | Spruce | <i>Picea abies</i>      | 47.2493 / 7.0629 | 1020 |
| Montfaucon (JU)  | 2007-2017 | Spruce | <i>Picea abies</i>      | 47.2776 / 7.0421 | 1000 |
| Develier (JU)    | 2007-2017 | Spruce | <i>Picea abies</i>      | 47.3697 / 7.2809 | 640  |
| Soyhières 1 (JU) | 2007-2017 | Pine   | <i>Pinus sylvestris</i> | 47.3914 / 7.3839 | 400  |
| Soyhières 2 (JU) | 2007-2017 | Pine   | <i>Pinus sylvestris</i> | 47.3892 / 7.3695 | 400  |
| Liesberg (BL)    | 2007-2017 | Pine   | <i>Pinus sylvestris</i> | 47.3953 / 7.4323 | 400  |
| Vicques (JU)     | 2007-2017 | Pine   | <i>Pinus sylvestris</i> | 47.3674 / 7.4353 | 570  |
| St-Brais (JU)    | 2007-2017 | Pine   | <i>Pinus sylvestris</i> | 47.3091 / 7.1220 | 950  |

\*Canton: BL: AG: Aargau; Basel-Landschaft; BS: Basel-Stadt; JU: Jura.
